# Supplementary material for: The behavioral response of prey fish to predators: the role of predator size
Source: PeerJ. 2017 Apr 20;5:e3222. doi: 10.7717/peerj.3222 (PMC5401624; doi:10.7717/peerj.3222)
Supplement: Data S1 [file peerj-05-3222-s001.xlsx]

## Sheet: speed
qy	Control		Size-matched predator		Large predator
	without companion	with a companion	without companion	with a companion	without companion	with a companion
	3.47016	6.75428	3.11088	2.79667	3.54174	3.15003
	2.99229	3.88701	3.35568	2.98677	3.30657	3.56649
	3.35366	3.30201	4.61453	3.49327	4.615	4.12224
	3.82387	2.42651	2.84848	2.66201	5.91706	4.67931
	5.30946	3.73645	3.88756	3.53236	4.3132	4.05213
	1.63212	2.77633	3.54674	3.37513	3.48566	3.09571
	4.34882	2.44336
	4.59745	4.58565
qy	Control		Size-matched predator		Large predator
	without companion	with a companion	without companion	with a companion	without companion	with a companion		mean		without companion	with a companion
mean	3.69098	3.73895	3.56065	3.14104	4.19654	3.77765			Control	3.69098	3.73895
sd	1.12003	1.43176	0.627569	0.375197	0.987427	0.61816			Size-matched predator	3.56065	3.14104
se	0.395989	0.506205	0.256204	0.153173	0.403116	0.252363			Large predator	4.19654	3.77765
								se		without companion	with a companion
									Control	0.395989	0.506205
									Size-matched predator	0.256204	0.153173
									Large predator	0.403116	0.252363
wl

## Sheet: distance
qy-qy	Control		Size-matched predator		Large predator
	without companion	with a companion	without companion	with a companion	without companion	with a companion
	1902.96	3026.15	1094.17	743.53	398.995	252.872
	1025.84	1138.36	1209.43	589.217	1090.14	347.548
	1387.38	1503.32	2264.14	707.569	2480.16	2003.41
	1320.42	681.767	185.348	196.346	3201.94	2204.92
	2854.48	1580.91	1797.26	1415.62	2052.04	1394.21
	82.5627	1222.35	1368.19	527.568	1407	897.65
	1116.6	728.205
	2611.98	2573.02
qy	Control		Size-matched predator		Large predator
	without companion	with a companion	without companion	with a companion	without companion	with a companion		mean		without companion	with a companion
mean	1537.78	1556.76	1319.76	696.642	1771.71	1183.44			Control	15.3778	15.5676
sd	898.249	839.587	703.159	402.412	1010.74	825.416			Size-matched predator	13.1976	6.96642
se	317.579	296.839	287.063	164.284	412.632	336.974			Large predator	17.7171	11.8344
								se		without companion	with a companion
									Control	3.17579	2.96839
									Size-matched predator	2.87063	1.64284
									Large predator	4.12632	3.36974
wl

## Sheet: ptm
ptm	Control		Size-matched predator		Large predator
	without companion	with a companion	without companion	with a companion	without companion	with a companion
	88.4	86.7	56.8	42.8	18.2	12.9
	55.3	47.2	58.1	31.8	53.2	15.7
	74.7	73.4	79.1	32.6	86.6	78.3
	55.7	45.3	10.5	11.9	87.2	75.9
	86.8	68.2	74.5	64.6	76.7	55.4
	8.2	74	62.2	25.2	65.4	47.1
	54.4	48.1
	91.5	90.7
qy	Control		Size-matched predator		Large predator
	without companion	with a companion	without companion	with a companion	without companion	with a companion		mean		without companion	with a companion
mean	64.375	66.7	56.8667	34.8167	64.55	47.55			Control	64.375	66.7
sd	27.6074	17.9706	24.434	17.7902	26.1714	28.3766			Size-matched predator	56.8667	34.8167
se	9.7607	6.35357	9.97512	7.2628	10.6844	11.5847			Large predator	64.55	47.55
								se		without companion	with a companion
									Control	9.7607	6.35357
									Size-matched predator	9.97512	7.2628
									Large predator	10.6844	11.5847
wl

## Sheet: distance between two fish
		Control	Size-matched predator	Large predator
		23.5409	17.4151	21.0324
		9.7614	23.1284	21.1513
		11.0815	19.0162	16.8514
		7.1642	25.9238	19.8244
		11.6476	24.2511	13.5353
		10.8826	18.5654	23.5462
		11.5286
		12.5654
		Control	Size-matched predator	Large predator
	mean	12.2715	21.3834	19.3235
	sd	4.83672	3.4979	3.57653
	se	1.71004	1.42801	1.46011

## Sheet: table 1
	the effect of treatment and without and with a companion on the activities of prey
		Treatment	Time	Treatment × Time
	Speed while moving	F2,17 = 0.981	F1,17 = 0.981	F2,17 = 0.392
		P = 0.395	P = 0.327	P = 0.682
	Percent time moving	F2,17 = 1.414	F1,17 = 7.008	F2,17 = 2.82
		P = 0.27	P = 0.017	P = 0.088
	Total distance moved	F2,17 = 0.986	F1,17 = 7.955	F2,17 = 2.406
		P = 0.393	P = 0.012	P = 0.12
